# Supplementary material for: Metabolic Effects of Bee Larva-Derived Protein in Mice: Assessment of an Alternative Protein Source
Source: MDPI journal article supplement (doi:10.3390/foods10112642), 2021-11-01
Supplement: s1 [file s1]

**Supplemental Table S1.** Ingredients of the diets.

|                      | 15% Casein | 30% Casein | 30% Bee |
|----------------------|------------|------------|---------|
| Ingredients          |            |            |         |
| Casein               | 195        | 390        | 0       |
| Bee larva            | 0          | 0          | 710     |
| $\beta$ -cornstarch  | 375        | 180        | 50      |
| $\alpha$ -cornstarch | 132        | 132        | 132     |
| Sucrose              | 100        | 100        | 100     |
| Lard                 | 150        | 150        | 0       |
| Cellulose            | 50         | 50         | 50      |
| AIN-93M mineral mix  | 35         | 35         | 35      |
| AIN-93VX vitamin mix | 10         | 10         | 10      |

**Supplemental Table S2.** Primer sequences for PCR.

| Gene                            | Forward                   | Reverse                  |
|---------------------------------|---------------------------|--------------------------|
| <i><math>\beta</math>-actin</i> | CATCCGTAAAGACCTCTATGCCAAC | ATGGAGCCACCGATCCACA      |
| <i>Pgcl<math>\alpha</math></i>  | AAGGGCCAAACAGAGAGAGA      | GCGTTGTGTCAGGTCTGATT     |
| <i>Pgcl<math>\beta</math></i>   | AGATGAAGATCCAAGCTGCCCACA  | TCCTCCTCCATTGGCTTGTATGGA |
| <i>Ucp-1</i>                    | GGCCCTTGTAACAACAAAATAC    | GGCAACAAGAGCTGACAGTAAAT  |
| <i>Ucp-3</i>                    | CTCTGCACTGTATGCTGAAGATG   | CACGTTCCAAGCTCCCAGA      |
| <i>D2</i>                       | TTCTGAGCCGCTCCAAGT        | GGAGCATCTTCACCCAGTTT     |
| <i>Cidea</i>                    | TGCTCTTCTGTATCGCCCAGT     | GCCGTGTTAAGGAATCTGCTG    |
| <i>Prdm16</i>                   | CAGCACGGTGAAGCCATTC       | GCGTGCATCCGCTTGTG        |
| <i>Acox-1</i>                   | TTCTACCAATCTGGCTGCAC      | GTGGGTGGTATGGTGTCTGTA    |
| <i>Tfam</i>                     | ATGTCTCCGGATCGTTTCAC      | CCAAAAAGACCTCGTTCAGC     |
| <i>Sirt1</i>                    | GCACCGAGGAACTACCTGAT      | CAGCATCTTGCCTGATTTGT     |
| <i>Glut4</i>                    | ATCAACGCCCCACAGAAA        | GAGAGCCCCAAAGGGTAGTGA    |
| <i>MyoD</i>                     | GTCGTAGCCATTCTGCCG        | AGCACTACAGTGGCGACTCA     |
| <i>Myogenin</i>                 | GTGGGAGTTGCATTCACTGG      | CTACAGGCCTTGCTCAGCTC     |
